# Supplementary material
Source: PubMed Central journal article supplement (PMC3568594)

PEPE\_1745\_[ATCC\_25745] ATGATTGATG TTGATGCTCT AAGCAAAAAA TATCCAGCGA TTAAGCAGAT GCAAGCTTAC GAACCAATTT 70  
 dsdA\_[DSM 22036] ATGATTGATG TTGATGCTCT AAGCAAAAAA TATCCAGCGA TTAAGCAGAT GCAAGCTTAC GAACCAATTT 70  
 dsdA\_[FAM13073] ATGATTGATG TTGATGCTCT AAGCAAAAAA TATCCAGCGA TTAAGCAGAT GCAAGCTTAC GAACCAATTT 70  
 dsdA\_[FAM17622] ATGATTGAGG TTGATGCTCT AAGCAAAAAA TATCCAGCGA TTAAGCAGAT GCAAGCTTAC GAACCAATTT 70  
 dsdA\_[FAM18813] ATGATTGATG TTGATGCTCT AAGCAAAAAA TATCCAGCGA TTAAGCAGAT GCAAGCTTAC GAACCAATTT 70  
 dsdA\_[FAM19080] ATGATTGATG TTGATGCTCT AAGCAAAAAA TATCCAGCGA TTAAGCAGAT GCAAGCTTAC GAACCAATTT 70  
 dsdA\_[FAM19132] ATGATTGATG TTGATGCTCT AAGCAAAAAA TATCCAGCGA TTAAGCAGAT GCAAGCTTAC GAACCAATTT 70  
 dsdA\_[FAM19144] ATGATTGATG TTGATGCTCT AAGCAAAAAA TATCCAGCGA TTAAGCAGAT GCAAGCTTAC GAACCAATTT 70  
 dsdA\_[FAM19169] ATGATTGATG TTGATGCTCT AAGCAAAAAA TATCCAGCGA TTAAGCAGAT GCAAGCTTAC GAACCAATTT 70  
 dsdA\_[FAM20650] ATGATTGATG TTGATGCTCT AAGCAAAAAA TATCCAGCGA TTAAGCAGAT GCAAGCTTAC GAACCAATTT 70

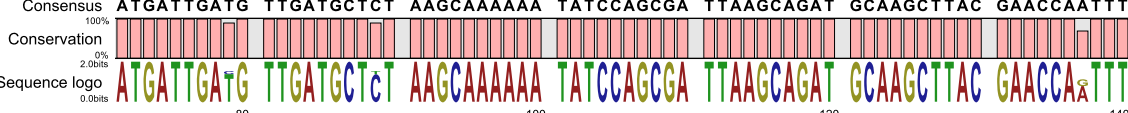

PEPE\_1745\_[ATCC\_25745] TTTGGAAGAA CCTGAATTAT AAAAAAGGAAG CTGAATTACC GGTGGAGTT GAACATATCT TCGATGCTGA 140  
 dsdA\_[DSM 22036] TTTGGAAGAA CCTGAATTAT AAAAAAGGAAG CTGAATTACC GGTGGAGTT GAACATATCT TCGATGCTGA 140  
 dsdA\_[FAM13073] TTTGGAAGAA CCTGAATTAT AAAAAAGGAAG CTGAATTACC GGTGGAGTT GAACATATCT TCGATGCTGA 140  
 dsdA\_[FAM17622] TTTGGAAGAA CCTGAATTAT AAAAAAGGAAG CTGAATTACC GGTGGAGTT GAACATATCT TCGATGCTGA 139  
 dsdA\_[FAM18813] TTTGGAAGAA CCTGAATTAT AAAAAAGGAAG CTGAATTACC GGTGGAGTT GAACATATCT TCGATGCTGA 140  
 dsdA\_[FAM19080] TTTGGAAGAA CCTGAATTAT AAAAAAGGAAG CTGAATTACC GGTGGAGTT GAACATATCT TCGATGCTGA 140  
 dsdA\_[FAM19132] TTTGGAAGAA CCTGAATTAT AAAAAAGGAAG CTGAATTACC GGTGGAGTT GAACATATCT TCGATGCTGA 140  
 dsdA\_[FAM19144] TTTGGAAGAA CCTGAATTAT AAAAAAGGAAG CTGAATTACC GGTGGAGTT GAACATATCT TCGATGCTGA 140  
 dsdA\_[FAM19169] TTTGGAAGAA CCTGAATTAT AAAAAAGGAAG CTGAATTACC GGTGGAGTT GAACATATCT TCGATGCTGA 140  
 dsdA\_[FAM20650] TTTGGAAGAA CCTGAATTAT AAAAAAGGAAG CTGAATTACC GGTGGAGTT GAACATATCT TCGATGCTGA 140

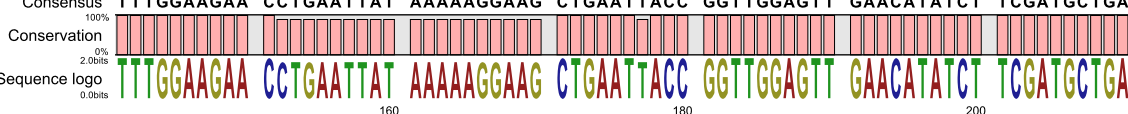

PEPE\_1745\_[ATCC\_25745] AGCTCGTTTT CAACGGTTTG CACCTTATTT TGAGGTAGCA TTCCAGAAA CTTTACCAAC ACATGGAATT 210  
 dsdA\_[DSM 22036] AGCTCGTTTT CAACGGTTTG CACCTTATTT TGAGGTAGCA TTCCAGAAA CTTTACCAAC ACATGGAATT 210  
 dsdA\_[FAM13073] AGCTCGTTTT CAACGGTTTG CACCTTATTT TGAGGTAGCA TTCCAGAAA CTTTACCAAC ACATGGAATT 210  
 dsdA\_[FAM17622] AGCTCGTTTT CAACGGTTTG CACCTTATTT TGAGGTAGCA TTCCAGAAA CTTTACCAAC ACATGGAATT 209  
 dsdA\_[FAM18813] AGCTCGTTTT CAACGGTTTG CACCTTATTT TGAGGTAGCA TTCCAGAAA CTTTACCAAC ACATGGAATT 210  
 dsdA\_[FAM19080] AGCTCGTTTT CAACGGTTTG CACCTTATTT TGAGGTAGCA TTCCAGAAA CTTTACCAAC ACATGGAATT 210  
 dsdA\_[FAM19132] AGCTCGTTTT CAACGGTTTG CACCTTATTT TGAGGTAGCA TTCCAGAAA CTTTACCAAC ACATGGAATT 210  
 dsdA\_[FAM19144] AGCTCGTTTT CAACGGTTTG CACCTTATTT TGAGGTAGCA TTCCAGAAA CTTTACCAAC ACATGGAATT 191  
 dsdA\_[FAM19169] AGCTCGTTTT CAACGGTTTG CACCTTATTT TGAGGTAGCA TTCCAGAAA CTTTACCAAC ACATGGAATT 210  
 dsdA\_[FAM20650] AGCTCGTTTT CAACGGTTTG CACCTTATTT TGAGGTAGCA TTCCAGAAA CTTTACCAAC ACATGGAATT 210

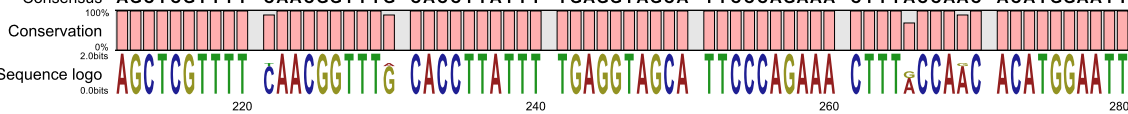

PEPE\_1745\_[ATCC\_25745] TTAGAAATCCC CTTTGCTCAA AATGGATAAG ATGAAGGCTG TTTTAAATGC CGAAGCTCAA AACCAAGTTA 280  
 dsdA\_[DSM 22036] TTAGAAATCCC CTTTGCTCAA AATGGATAAG ATGAAGGCTG TTTTAAATGC CGAAGCTCAA AACCAAGTTA 280  
 dsdA\_[FAM13073] TTAGAAATCCC CTTTGCTCAA AATGGATAAG ATGAAGGCTG TTTTAAATGC CGAAGCTCAA AACCAAGTTA 280  
 dsdA\_[FAM17622] TTAGAAATCCC CTTTGCTCAA AATGGATAAG ATGAAGGCTG TTTTAAATGC CGAAGCTCAA AACCAAGTTA 279  
 dsdA\_[FAM18813] TTAGAAATCCC CTTTGCTCAA AATGGATAAG ATGAAGGCTG TTTTAAATGC CGAAGCTCAA AACCAAGTTA 280  
 dsdA\_[FAM19080] TTAGAAATCCC CTTTGCTCAA AATGGATAAG ATGAAGGCTG TTTTAAATGC CGAAGCTCAA AACCAAGTTA 280  
 dsdA\_[FAM19132] TTAGAAATCCC CTTTGCTCAA AATGGATAAG ATGAAGGCTG TTTTAAATGC CGAAGCTCAA AACCAAGTTA 280  
 dsdA\_[FAM19144] TTAGAAATCCC CTTTGCTCAA AATGGATAAG ATGAAGGCTG TTTTAAATGC CGAAGCTCAA AACCAAGTTA 261  
 dsdA\_[FAM19169] TTAGAAATCCC CTTTGCTCAA AATGGATAAG ATGAAGGCTG TTTTAAATGC CGAAGCTCAA AACCAAGTTA 280  
 dsdA\_[FAM20650] TTAGAAATCCC CTTTGCTCAA AATGGATAAG ATGAAGGCTG TTTTAAATGC CGAAGCTCAA AACCAAGTTA 280

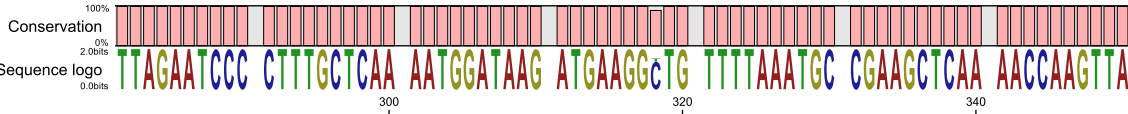

PEPE\_1745\_[ATCC\_25745] AGGGTGATTT GTATCTTAAG GCTGATAATT ATCTACCAAT TTCGGGCTCA ATTAAGTCAC GTGGTGAAT 350  
 dsdA\_[DSM 22036] AGGGTGATTT GTATCTTAAG GCTGATAATT ATCTACCAAT TTCGGGCTCA ATTAAGTCAC GTGGTGAAT 350  
 dsdA\_[FAM13073] AGGGTGATTT GTATCTTAAG GCTGATAATT ATCTACCAAT TTCGGGCTCA ATTAAGTCAC GTGGTGAAT 350  
 dsdA\_[FAM17622] AGGGTGATTT GTATCTTAAG GCTGATAATT ATCTACCAAT TTCGGGCTCA ATTAAGTCAC GTGGTGAAT 349  
 dsdA\_[FAM18813] AGGGTGATTT GTATCTTAAG GCTGATAATT ATCTACCAAT TTCGGGCTCA ATTAAGTCAC GTGGTGAAT 350  
 dsdA\_[FAM19080] AGGGTGATTT GTATCTTAAG GCTGATAATT ATCTACCAAT TTCGGGCTCA ATTAAGTCAC GTGGTGAAT 350  
 dsdA\_[FAM19132] AGGGTGATTT GTATCTTAAG GCTGATAATT ATCTACCAAT TTCGGGCTCA ATTAAGTCAC GTGGTGAAT 350  
 dsdA\_[FAM19144] AGGGTGATTT GTATCTTAAG GCTGATAATT ATCTACCAAT TTCGGGCTCA ATTAAGTCAC GTGGTGAAT 331  
 dsdA\_[FAM19169] AGGGTGATTT GTATCTTAAG GCTGATAATT ATCTACCAAT TTCGGGCTCA ATTAAGTCAC GTGGTGAAT 350  
 dsdA\_[FAM20650] AGGGTGATTT GTATCTTAAG GCTGATAATT ATCTACCAAT TTCGGGCTCA ATTAAGTCAC GTGGTGAAT 350

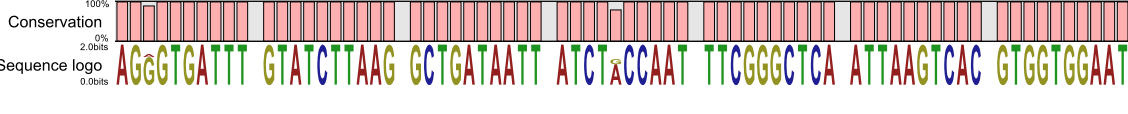

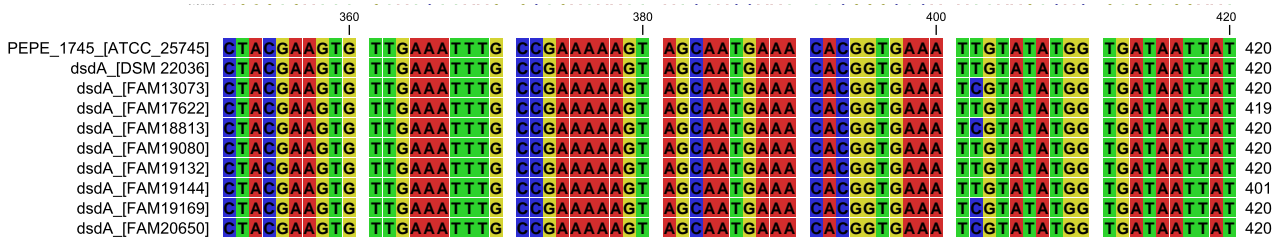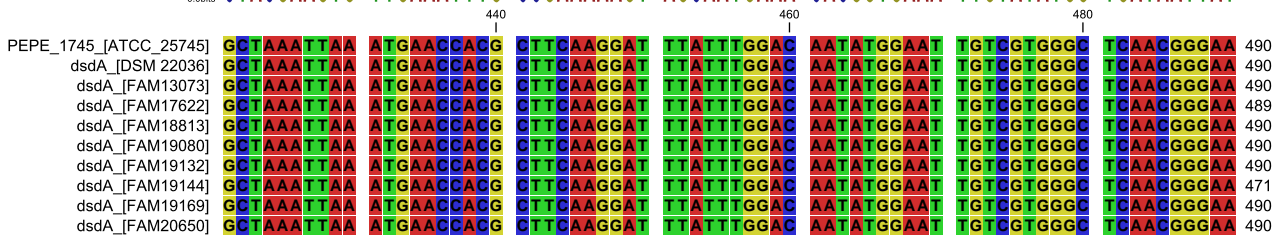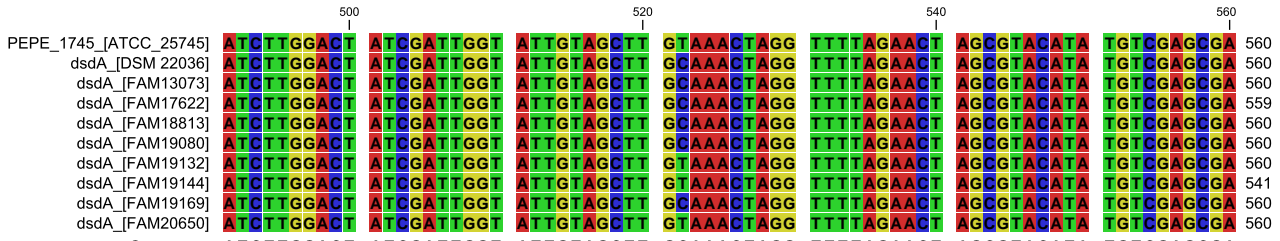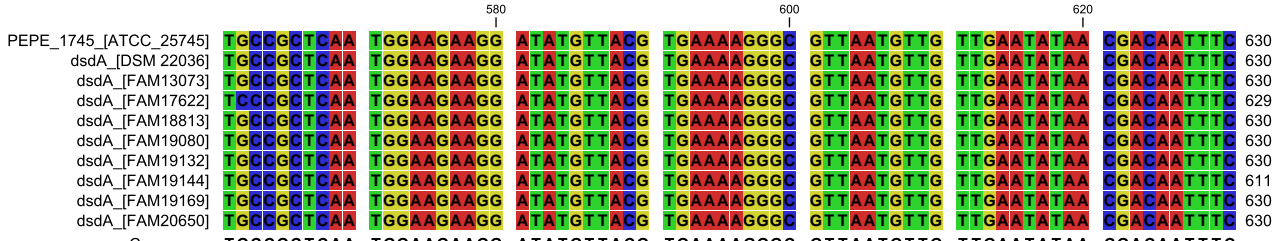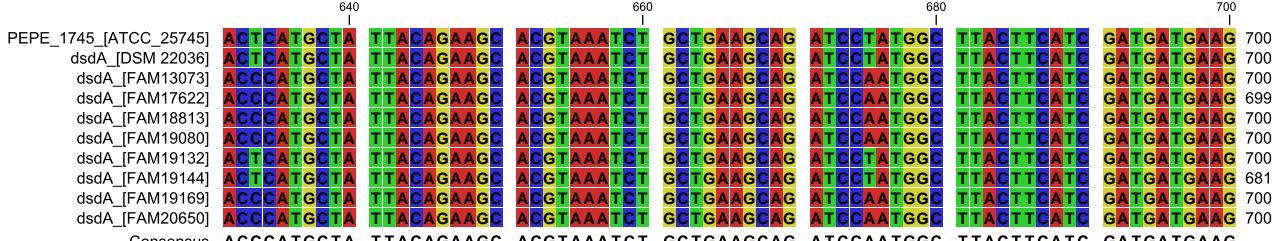

PEPE\_1745\_[ATCC\_25745] GGT CGT ACGA TTT ATT CTTG GGAT ATT CCG TTGCTGCAGT TCGTCTTCAA GCTCAATTGA AGGCTCAAAA 770  
 dsdA\_[DSM 22036] GGT CGT ACGA TTT ATT CTTG GGAT ATT CCG TTGCTGCAGT TCGTCTTCAA GCTCAATTGA AGGCTCAAAA 770  
 dsdA\_[FAM13073] GGT CGT ACGA TTT ATT CTTG GGAT ATT CCG TTGCTGCAGT TCGTCTTCAA GCTCAATTGA AGGCTCAAAA 770  
 dsdA\_[FAM17622] GGT CGT ACGA TTT ATT CTTG GGAT ATT CCG TTGCTGCAGT TCGTCTTCAA GCTCAATTGA AGGCTCAAAA 769  
 dsdA\_[FAM18813] GGT CGT ACGA TTT ATT CTTG GGAT ATT CCG TTGCTGCAGT TCGTCTTCAA GCTCAATTGA AGGCTCAAAA 770  
 dsdA\_[FAM19080] GGT CGT ACGA TTT ATT CTTG GGAT ATT CCG TTGCTGCAGT TCGTCTTCAA GCTCAATTGA AGGCTCAAAA 770  
 dsdA\_[FAM19132] GGT CGT ACGA TTT ATT CTTG GGAT ATT CCG TTGCTGCAGT TCGTCTTCAA GCTCAATTGA AGGCTCAAAA 770  
 dsdA\_[FAM19144] GGT CGT ACGA TTT ATT CTTG GGAT ATT CCG TTGCTGCAGT TCGTCTTCAA GCTCAATTGA AGGCTCAAAA 751  
 dsdA\_[FAM19169] GGT CGT ACGA TTT ATT CTTG GGAT ATT CCG TTGCTGCAGT TCGTCTTCAA GCTCAATTGA AGGCTCAAAA 770  
 dsdA\_[FAM20650] GGT CGT ACGA TTT ATT CTTG GGAT ATT CCG TTGCTGCAGT TCGTCTTCAA GCTCAATTGA AGGCTCAAAA 770

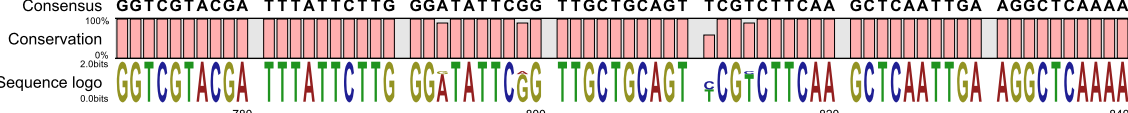

PEPE\_1745\_[ATCC\_25745] TATCAAAGTT GATGCAGAAC ATCCATTATT TGTATATCTA CCTGCTGGAG TAGGTGGTAG CCCTAGTGGT 840  
 dsdA\_[DSM 22036] TATCAAAGTT GATGCAGAAC ATCCATTATT TGTATATCTA CCTGCTGGAG TAGGTGGTAG CCCTAGTGGT 840  
 dsdA\_[FAM13073] TATCAAAGTT GATGCAGAAC ATCCATTATT TGTATATCTA CCTGCTGGAG TAGGTGGTAG CCCTAGTGGT 840  
 dsdA\_[FAM17622] TATCAAAGTT GATGCAGAAC ATCCATTATT TGTATATCTA CCTGCTGGAG TAGGTGGTAG CCCTAGTGGT 839  
 dsdA\_[FAM18813] TATCAAAGTT GATGCAGAAC ATCCATTATT TGTATATCTA CCTGCTGGAG TAGGTGGTAG CCCTAGTGGT 840  
 dsdA\_[FAM19080] TATCAAAGTT GATGCAGAAC ATCCATTATT TGTATATCTA CCTGCTGGAG TAGGTGGTAG CCCTAGTGGT 840  
 dsdA\_[FAM19132] TATCAAAGTT GATGCAGAAC ATCCATTATT TGTATATCTA CCTGCTGGAG TAGGTGGTAG CCCTAGTGGT 840  
 dsdA\_[FAM19144] TATCAAAGTT GATGCAGAAC ATCCATTATT TGTATATCTA CCTGCTGGAG TAGGTGGTAG CCCTAGTGGT 821  
 dsdA\_[FAM19169] TATCAAAGTT GATGCAGAAC ATCCATTATT TGTATATCTA CCTGCTGGAG TAGGTGGTAG CCCTAGTGGT 840  
 dsdA\_[FAM20650] TATCAAAGTT GATGCAGAAC ATCCATTATT TGTATATCTA CCTGCTGGAG TAGGTGGTAG CCCTAGTGGT 840

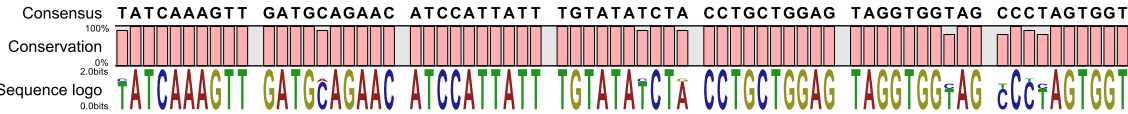

PEPE\_1745\_[ATCC\_25745] GTAGCCTTTG GTCTAAAGAA GATTATTGGC GAAAAAGTTC ATCCAAATTTT TGGGAGCCA ACTCATATTC 910  
 dsdA\_[DSM 22036] GTAGCCTTTG GTCTAAAGAA GATTATTGGC GAAAAAGTTC ATCCAAATTTT TGGGAGCCA ACTCATATTC 910  
 dsdA\_[FAM13073] GTAGCCTTTG GTCTAAAGAA GATTATTGGC GAAAAAGTTC ATCCAAATTTT TGGGAGCCA ACTCATATTC 910  
 dsdA\_[FAM17622] GTAGCCTTTG GTCTAAAGAA GATTATTGGC GAAAAAGTTC ATCCAAATTTT TGGGAGCCA ACTCATATTC 909  
 dsdA\_[FAM18813] GTAGCCTTTG GTCTAAAGAA GATTATTGGC GAAAAAGTTC ATCCAAATTTT TGGGAGCCA ACTCATATTC 910  
 dsdA\_[FAM19080] GTAGCCTTTG GTCTAAAGAA GATTATTGGC GAAAAAGTTC ATCCAAATTTT TGGGAGCCA ACTCATATTC 910  
 dsdA\_[FAM19132] GTAGCCTTTG GTCTAAAGAA GATTATTGGC GAAAAAGTTC ATCCAAATTTT TGGGAGCCA ACTCATATTC 910  
 dsdA\_[FAM19144] GTAGCCTTTG GTCTAAAGAA GATTATTGGC GAAAAAGTTC ATCCAAATTTT TGGGAGCCA ACTCATATTC 891  
 dsdA\_[FAM19169] GTAGCCTTTG GTCTAAAGAA GATTATTGGC GAAAAAGTTC ATCCAAATTTT TGGGAGCCA ACTCATATTC 910  
 dsdA\_[FAM20650] GTAGCCTTTG GTCTAAAGAA GATTATTGGC GAAAAAGTTC ATCCAAATTTT TGGGAGCCA ACTCATATTC 910

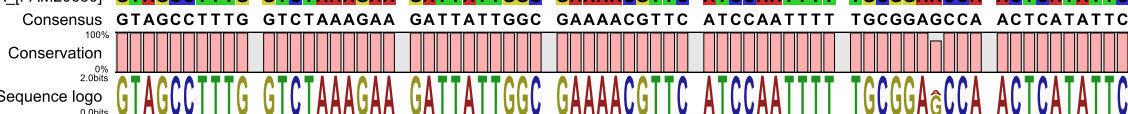

PEPE\_1745\_[ATCC\_25745] CATCAGTTTC GCTAGGAATG ATGACGGGCT TAAATGATCA AATTTTCAGTT TATGATGCTG GAATCGATGG 980  
 dsdA\_[DSM 22036] CATCAGTTTC GCTAGGAATG ATGACGGGCT TAAATGATCA AATTTTCAGTT TATGATGCTG GAATCGATGG 980  
 dsdA\_[FAM13073] CATCAGTTTC GCTAGGAATG ATGACGGGCT TAAATGATCA AATTTTCAGTT TATGATGCTG GAATCGATGG 980  
 dsdA\_[FAM17622] CATCAGTTTC GCTAGGAATG ATGACGGGCT TAAATGATCA AATTTTCAGTT TATGATGCTG GAATCGATGG 979  
 dsdA\_[FAM18813] CATCAGTTTC GCTAGGAATG ATGACGGGCT TAAATGATCA AATTTTCAGTT TATGATGCTG GAATCGATGG 980  
 dsdA\_[FAM19080] CATCAGTTTC GCTAGGAATG ATGACGGGCT TAAATGATCA AATTTTCAGTT TATGATGCTG GAATCGATGG 980  
 dsdA\_[FAM19132] CATCAGTTTC GCTAGGAATG ATGACGGGCT TAAATGATCA AATTTTCAGTT TATGATGCTG GAATCGATGG 980  
 dsdA\_[FAM19144] CATCAGTTTC GCTAGGAATG ATGACGGGCT TAAATGATCA AATTTTCAGTT TATGATGCTG GAATCGATGG 961  
 dsdA\_[FAM19169] CATCAGTTTC GCTAGGAATG ATGACGGGCT TAAATGATCA AATTTTCAGTT TATGATGCTG GAATCGATGG 980  
 dsdA\_[FAM20650] CATCAGTTTC GCTAGGAATG ATGACGGGCT TAAATGATCA AATTTTCAGTT TATGATGCTG GAATCGATGG 980

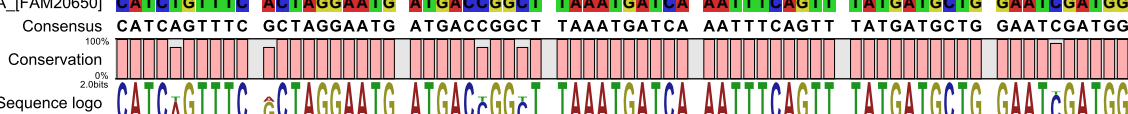

PEPE\_1745\_[ATCC\_25745] AGTAACTAAG GCTGACGGTC TTGCTGTTGG GCGTCCATCT AGAATTGCTG GTAAGATGAT GGATACATTA 1050  
 dsdA\_[DSM 22036] AGTAACTAAG GCTGACGGTC TTGCTGTTGG GCGTCCATCT AGAATTGCTG GTAAGATGAT GGATACATTA 1050  
 dsdA\_[FAM13073] AGTAACTAAG GCTGACGGTC TTGCTGTTGG GCGTCCATCT AGAATTGCTG GTAAGATGAT GGATACATTA 1050  
 dsdA\_[FAM17622] AGTAACTAAG GCTGACGGTC TTGCTGTTGG GCGTCCATCT AGAATTGCTG GTAAGATGAT GGATACATTA 1049  
 dsdA\_[FAM18813] AGTAACTAAG GCTGACGGTC TTGCTGTTGG GCGTCCATCT AGAATTGCTG GTAAGATGAT GGATACATTA 1050  
 dsdA\_[FAM19080] AGTAACTAAG GCTGACGGTC TTGCTGTTGG GCGTCCATCT AGAATTGCTG GTAAGATGAT GGATACATTA 1050  
 dsdA\_[FAM19132] AGTAACTAAG GCTGACGGTC TTGCTGTTGG GCGTCCATCT AGAATTGCTG GTAAGATGAT GGATACATTA 1050  
 dsdA\_[FAM19144] AGTAACTAAG GCTGACGGTC TTGCTGTTGG GCGTCCATCT AGAATTGCTG GTAAGATGAT GGATACATTA 1031  
 dsdA\_[FAM19169] AGTAACTAAG GCTGACGGTC TTGCTGTTGG GCGTCCATCT AGAATTGCTG GTAAGATGAT GGATACATTA 1050  
 dsdA\_[FAM20650] AGTAACTAAG GCTGACGGTC TTGCTGTTGG GCGTCCATCT AGAATTGCTG GTAAGATGAT GGATACATTA 1050

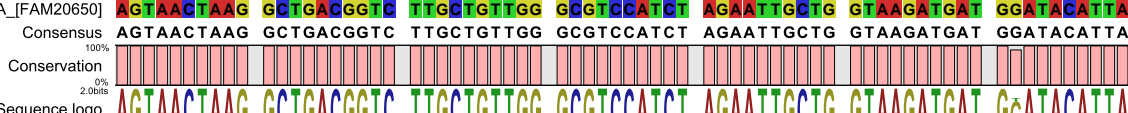

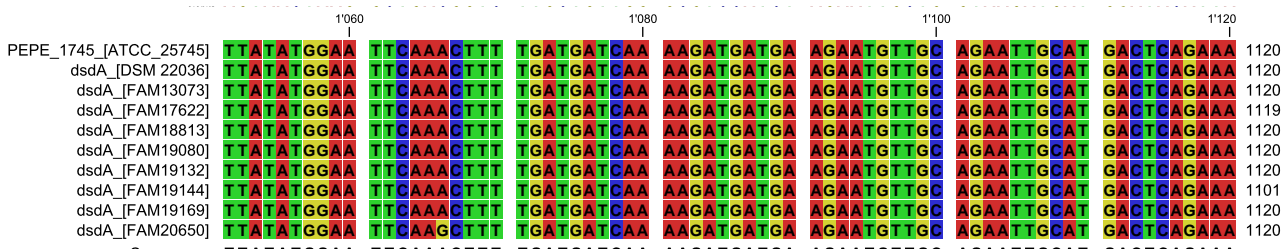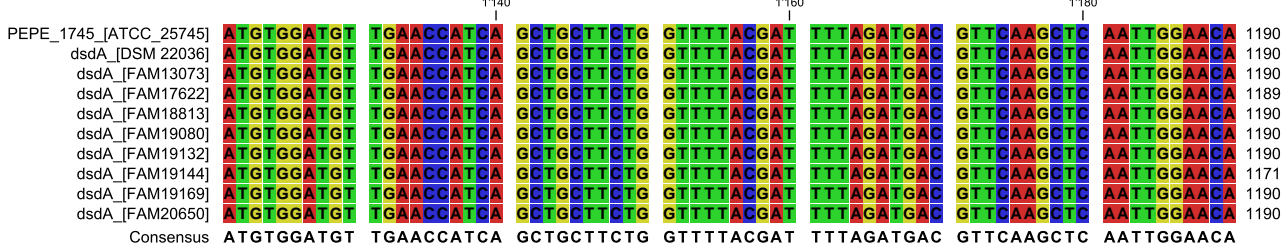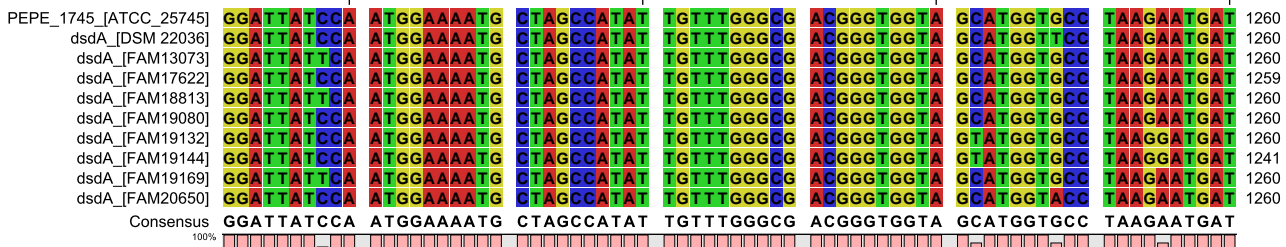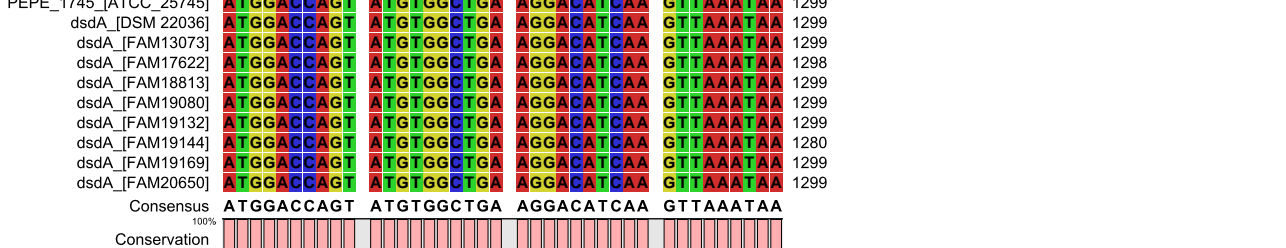

Supplement: AEM.03085-12_zam999104117so1.pdf [file AEM.03085-12_zam999104117so1.pdf]
